# Supplementary material
Source: Research Square preprint supplement (doi:10.21203/rs.3.rs-4421084/v3)
Supplement: Supplementary file 1 [file 6544670e628f8c931c6dd63e.docx]

**Table 1.** Demographic and clinical characteristics of MDD patients and controls

| Parameter | MDD (n=40) | Controls (n=40) | p |
| --- | --- | --- | --- |
| Age (y, mean ± SD) | 34.45 ± 11.45 | 32.75 ± 12.46 | 0.52 |
| Age of onset (mean ± SD) | 31.38 ± 11.12 | - |  |
| Gender (M/F, %) | 10/30 (25.0/75.0) | 13/27 (32.5/67.5) | 0.45 |
| Marital status  Single/Married (n, %) | 16 (40.0)/24 (60.0) | 28 (70.0)/12 (30.0) | <0.01 |
| Family history of psychiatric disease (+/-, %) | 0 (0.0)/40 (100.0) | 6 (15.0)/34 (85.0) | <0.001 |
| Psychiatric comorbidity (+/-, %) | 6/34 (15.0/85.0) | 0/40 (0.0/100.0) | 0.01 |
| TSH (mIU/mL) | 2.51 ± 2.74  (n=18) | 2.16 ± 1.20  (n=18) | 0.62 |
| Total Cholesterol (mg/dL) | 183.63 ± 25.69  (n=8) | 206.5 ± 55.38  (n=20) | 0.27 |
| HDL Cholesterol (mg/dl) | 46.43 ± 10.06  (n=7) | 56.00 ± 16.26  (n=20) | 0.15 |
| LDL Cholesterol (mg/dl) | 118.71 ± 19.23  (n=7) | 135.80 ± 45.14  (n=20) | 0.34 |
| Triglycerides (mg/dl) | 117.63 ± 65.19  (n=8) | 147.05 ± 119.18  (n=19) | 0.51 |
| BMI (kg/m²) | 25.73 ± 5.06 | 24.62 ± 4.35 | 0.29 |
| Smoking status (n, %)  Nonsmoker  1-25 cigarettes per day  25-50 cigarettes per day | 22 (55.0)  13 (32.5)  5 (12.5) | 28 (70.0)  11 (27.5)  1 (2.5) | 0.16 |
| Alcohol consumption (n, %)  None (  1-2 drinks per month  2-3 drinks per month | 35 (87.5)  3 (7.5)  2 (5.0) | 28 (70.0)  4 (10.0)  8 (20.0) | 0.10 |
| Exercise (walking) (n, %)  None  1 day a week  2 days a week  3 days a week  5 days a week | 34 (85.0)  3 (7.5)  2 (5.0)  1 (2.5)  0 (0.0) | 10 (25.0)  26 (65.0)  1 (2.5)  2 (5.0)  1 (2.5) | <0.01 |
| Sleeping status (n, %)  1-4 hours a day  4-7 hours a day  7-10 hours a day  10-12 hours a day | 8 (20.0)  18 (45.0)  10 (25.0)  4 (10.0) | 2 (5.0)  24 (60.0)  13 (32.5)  1 (2.5) | 0.08 |

BMI: body mass index

**Table 2.** Characteristics of MDD patients with respect to gender

| Parametre | Male (n = 10) | Female (n = 30) | p |
| --- | --- | --- | --- |
| Age (y, mean ± SD) | 34.20 ± 12.70 | 34.53 ± 11.24 | 0.88 |
| Age of onset (y, mean ± SD) | 29.20 ± 11.12 | 32.10 ± 11.21 | 0.55 |
| BDI Scores (mean ± SD) | 35.10 ± 10.35 | 38.37 ± 8.43 | 0.33 |
| HRSD Scores (mean ± SD) | 27.90 ± 6.08 | 30.13 ± 8.41 | 0.14 |

BDI: Beck depression inventory; HRSD: Hamilton Rating Scale for Depression

**Table 3. Relative expression of *NEGR1* mRNA and NEGR1 protein levels in MDD patients and healthy controls**

| Parameter | MDD – FLX (-) | Controls – FLX (-) | p |
| --- | --- | --- | --- |
| *NEGR1* mRNA expression  Range | 1.68 ± 3.51  0.0112-14.6900  (n=17) | 0.27 ± 0.35  0.0193-1.2400  (n=33) | 0.11 |
| NEGR1 protein expression (pg/ml)  Range | 107.26 ± 190.50  6.268-773.263  (n=40) | 30.29 ± 36.16  10.713-197.993  (n=40) | 0.01 |
|  | **MDD – FLX (+)** | **Controls – FLX (+)** | **p** |
| *NEGR1* mRNA expression  Range | 1.41 ± 2.01  0.0088-7.0000  (n=12) | 0.36 ± 9.44  0.0092-1.8800  (n=30) | 0.10 |
| NEGR1 protein expression (pg/ml)  Range | 102.25 ± 156.16  5.666-590.691  (n=40) | 37.99 ± 36.78  9.495-213.728  (n=40) | 0.01 |

FLX: Fluoxetine. Student's t test was performed. Data presented as mean ± SD. P values were confirmed with the nonparametric Wilcoxon test.
